# Supplementary material for: The Ormdl genes regulate the sphingolipid synthesis pathway to ensure proper myelination and neurologic function in mice
Source: eLife. 2019 Dec 27;8:e51067. doi: 10.7554/eLife.51067 (PMC6934382; doi:10.7554/eLife.51067)
Supplement: Figure 1—figure supplement 2—source data 1. [file elife-51067-fig1-figsupp2-data1.xlsx]

## Sheet: Brain Ormdls
	Individual sphingolipid levels in brain from WT and Ormdl KO mice
	Individual ceramides with different fatty-acid chain lengths- pmol/mg protein													Individual dihydroceramides with different fatty-acid chain lengths- pmol/mg protein
	C14-Cer	C16-Cer	C18-Cer	C18:1-Cer	C20-Cer	C20:1-Cer	C20:4-Cer	C22-Cer	C22:1-Cer	C24-Cer	C24:1-Cer	C26-Cer	C26:1-Cer	C14-DHCer	C16-DHCer	C18-DHCer	C18:1-DHCer	C20-DHCer	C20:1-DHCer	C22-DHCer	C22:1-DHCer	C24-DHCer	C24:1-DHCer	C26-DHCer	C26:1-DHCer
WT-1	0.837778	4.81826	254.056	140.483	116.17	4.27299	0.342915	24.4131	0.738188	43.5626	78.5803	4.75542	3.61711	0.00106768	0.0427817	3.2334	0.684683	2.28354	0.018432	1.92921	0.317657	3.60614	3.03844	1.58118	0.334244
WT-2	0.59132	4.47375	217.391	126.212	97.9031	2.40771	Brain	12.9815	0.441676	30.4157	41.6023	2.55186	1.99242	0.00155627	0.0492439	2.98822	0.680682	1.22756	0.0460183	1.2564	0.152568	1.92458	1.51078	0.959778	0.229932
WT-3	0.0228359	8.80703	300.076	163.019	123.644	3.48672	0.295569	24.4638	1.26697	55.6805	63.1648	4.16785	3.01003	0.016664	0.107895	5.43959	0.608188	2.92022	0.00627374	2.64534	0.266062	4.02071	2.94818	0.948005	0.520237
WT-4	0.16319	3.45627	169.659	96.9961	83.3098	2.8914	0.352323	14.284	0.770817	24.8942	39.3547	1.93389	2.50017	0.0173032	0.0893525	1.69188	0.287844	2.14706	0.0038036	1.69839	0.256243	2.40018	1.98706	0.871128	0.465911
WT-5	0.68124	4.70674	272.196	161.367	127.919	9.46403	0.788863	21.9007	1.08959	41.6537	58.0834	3.49703	3.10769	0.00528573	0.112367	4.58394	0.821968	2.602	0.116676	1.67912	0.217345	3.00946	3.02561	0.428869	0.420366
WT-6	0.611014	5.46672	221.031	122.125	88.1157	6.04934	0.026004	27.725	1.24676	47.279	89.8077	2.59452	6.0027	0.00692127	0.100387	3.0845	0.653245	1.57181	0.0050355	2.53135	0.404118	4.32651	4.04266	0.992372	0.719951
WT-7	0.0483171	3.47375	229.966	131.06	116.953	6.68595	0.220732	14.7923	1.36917	25.3174	48.6872	3.50317	2.23677	0.0028227	0.0889296	3.40677	0.570702	2.28725	0.0128777	1.24251	0.177453	2.37771	2.16374	1.13443	0.292161
WT-8	0.193121	2.01597	309.146	144.01	125.715	3.85776	0.319875	17.8871	1.10856	27.6462	46.9482	3.01583	2.90684	0.028635	0.0804855	3.92487	0.901295	2.1362	0.0167126	1.35485	0.233388	2.23271	2.25355	0.77773	0.445927
Ormdl1 KO-1	0.185083	7.54816	333.575	162.745	125.152	8.44459	0.197804	22.3684	1.81045	38.8882	47.4709	4.49966	4.15439	0.0114802	0.0793632	3.79619	0.767149	2.86086	0.0373855	1.56697	0.345449	3.23494	2.44169	1.65223	0.750148
Ormdl1 KO-2	0.709708	4.58746	296.04	137.368	118.89	4.78328	0.391938	24.1613	1.63192	51.2496	52.7387	2.92378	4.11835	0.00801117	0.0954267	4.71999	0.74431	2.75423	0.0175273	1.49525	0.152363	2.85592	2.71904	0.725105	0.640044
Ormdl1 KO-3	0.0890483	3.87381	210.47	139.826	91.4919	3.37672	0.0971095	13.241	0.722184	18.6229	31.5384	3.74799	1.68327	0.0155271	0.0464486	2.92826	0.355829	1.617	0.0427046	0.888549	0.0813488	1.10178	1.18767	0.377374	0.372043
Ormdl1 KO-4	0.167247	5.09773	261.204	135.847	97.7297	6.00106	0.0301179	28.5657	1.73256	40.9293	75.5672	6.33247	3.24316	0.00317324	0.0414232	4.36218	0.71354	1.97089	0.0351047	2.04362	0.390478	2.98645	3.33182	0.984111	0.433268
Ormdl1 KO-5	0.266931	4.34918	234.973	146.157	80.5813	5.87392	0.226629	12.131	0.786341	23.5443	38.3272	1.23989	1.73958	0.00371404	0.0761326	3.70415	0.659937	1.44172	0.0210269	1.08986	0.14834	1.47399	1.73081	0.375136	0.47469
Ormdl1 KO-6	0.406115	3.54095	231.286	125.558	88.6241	4.61075	0.319899	18.4876	1.78071	36.7608	58.0697	3.80792	3.14483	0.00139434	0.0978924	2.13683	0.606661	1.83664	0.0118868	1.67498	0.218531	3.09803	2.85661	0.37462	0.55271
Ormdl1 KO-7	0.366791	3.28712	284.778	159.335	100.177	5.49248	0.0995033	13.781	0.354913	26.9475	44.4987	4.7317	1.85956	0.00227492	0.0454892	3.17884	0.480773	1.65074	0.00438632	1.349	0.1973	2.55804	2.36181	0.457583	0.56038
Ormdl1 KO-8	0.701388	4.56339	261.612	116.907	122.855	4.30102	0.0528477	26.0864	1.69589	43.681	64.5961	4.51832	3.67908	0.0090958	0.0811164	3.84533	0.631743	2.38288	0.0693242	2.52882	0.235986	3.48583	3.54855	0.582373	0.585408
Ormdl2 KO-1	0.265012	5.82334	213.747	104.824	81.1623	5.01411	0.138425	28.8374	1.43427	52.4013	73.1788	2.89944	4.03914	0.0160485	0.146587	3.44046	0.287636	2.07974	0.0346521	3.11315	0.373114	4.52403	4.49862	0.532471	0.506883
Ormdl2 KO-2	0.271225	5.46576	281.568	72.5184	97.0413	1.74364	0.369683	28.6971	2.86277	39.1573	65.9872	2.82625	5.01372	0.0894453	0.0762212	3.01375	0.526293	2.19818	0.0388216	2.42461	0.339683	2.50071	3.36545	0.388487	0.331527
Ormdl2 KO-3	0.365916	5.11184	330.854	149.461	115.578	5.79207	0.275958	14.8848	1.48113	24.3937	46.896	3.42606	2.16024	0.00360063	0.0630611	3.68762	0.484189	2.32929	0.0215838	1.05226	0.288101	1.94554	1.63574	0.480553	0.297286
Ormdl2 KO-4	1.05483	3.968	277.943	136.039	96.7767	4.46402	0.0801347	23.5847	2.26952	42.0362	58.8322	4.81225	4.34796	0.0113969	0.119773	4.15774	0.455415	1.94635	0.0042109	1.58149	0.286405	2.83543	3.60869	1.00328	0.469686
Ormdl2 KO-5	0.0822441	2.63566	240.738	133.406	98.9363	5.54754	0.642167	12.6868	0.267367	16.2037	32.7601	2.12278	1.78868	0.000121489	0.034899	2.8953	0.352995	1.52152	0.00849235	0.87602	0.156131	1.51339	1.4429	0.340905	0.444526
Ormdl2 KO-6	0.196096	3.33979	257.092	147.07	106.091	1.18642	0.428567	13.3093	0.687381	22.6802	50.3573	2.2266	2.82251	0.00688588	0.121839	2.90694	0.553248	2.5412	0.00631842	1.33356	0.276489	2.1737	2.52915	0.396342	0.384655
Ormdl2 KO-7	0.303478	3.20338	264.674	122.321	98.4279	3.94797	0.0221341	18.0726	1.49644	27.8257	47.7783	1.67685	2.84991	0.0010068	0.0390993	2.5181	0.353955	1.95637	0.0172314	1.39563	0.313124	1.96241	2.10395	0.512911	0.311885
Ormdl2 KO-8	0.321325	4.65629	300.613	135.391	109.281	5.93023	0.183874	21.28	1.11394	24.6087	57.4957	1.05579	3.23304	0.0100843	0.0927497	2.97952	0.536012	2.18043	0.0175476	1.66741	0.183261	2.59042	2.45349	0.5978	0.206318
Ormdl3 KO-1	0.258461	4.65998	443.605	183.337	160.59	4.84083	0.0266021	17.9603	2.16434	27.3146	56.3505	4.07274	2.63864	0.0041943	0.185607	9.70292	1.36566	4.63184	0.0146517	1.18476	0.162322	1.99317	2.12996	0.463526	0.167168
Ormdl3 KO-2	0.363084	5.32278	443.077	172.384	174.907	6.25155	0.331175	19.2189	1.02005	27.6315	58.3602	2.0948	3.48011	0.000684046	0.196065	6.86944	0.711877	3.05256	0.0204411	1.29229	0.248508	1.48764	2.4255	0.208356	0.520987
Ormdl3 KO-3	0.128028	5.06905	478.826	150.422	197.45	6.29066	0.262176	14.5579	1.70741	23.6497	47.9103	3.42285	3.82269	0.00787615	0.218524	8.87604	0.891725	4.90551	0.0520993	0.98506	0.188627	1.64527	1.81352	0.36159	0.415737
Ormdl3 KO-4	0.165156	3.85344	412.465	85.2597	141.647	4.88225	0.16126	21.5216	1.93634	33.4189	63.9048	3.67434	4.15314	0.00759708	0.235472	8.61662	0.863484	5.91951	0.033835	1.83103	0.369631	2.60041	2.65039	0.354085	0.316939
Ormdl3 KO-5	0.299925	4.13298	478.112	191.664	204.831	2.46693	0.236777	19.5485	2.06053	30.7825	62.2395	2.55163	3.93558	0.00419888	0.181991	7.14833	0.931991	5.88499	0.0738771	1.72416	0.148505	2.38077	2.41243	0.577492	0.266202
Ormdl3 KO-6	0.602176	4.95538	446.563	91.7449	161.157	2.52287	0.320757	15.8411	1.88658	26.8047	58.4161	1.38376	2.88894	0.00744964	0.244631	7.34459	0.834834	6.70821	0.0199166	1.37654	0.202165	2.17719	2.16065	0.402937	0.386824
Ormdl3 KO-7	0.142753	5.30993	546.413	215.592	198.074	6.78592	0.730366	14.2625	0.471021	21.3645	53.2433	1.82837	3.82215	0.0151198	0.160936	8.80712	1.54048	4.57929	0.0490369	1.24652	0.152556	1.51791	1.64098	0.327239	0.293366
Ormdl3 KO-8	0.495367	4.43634	597.272	220.994	260.185	13.5504	0.532301	22.1396	1.43362	31.9026	67.6281	1.86292	4.27927	0.000483604	0.125798	8.85786	1.31753	5.98628	0.11934	1.16809	0.244958	1.95387	2.09133	0.654698	0.426398
Ormdl1/2 double KO-1	0.148281	3.8598	271.045	155.143	106.522	6.1906	0.102604	11.6507	0.873637	13.4743	36.1536	2.04769	2.2954	0.00846381	0.0811047	3.18461	0.565289	1.48336	0.0330668	0.906439	0.0850641	1.27991	1.22665	0.225406	0.459043
Ormdl1/2 double KO-2	0.174885	1.97731	287.402	148.532	105.987	7.34376	0.0273881	11.7446	1.04712	17.9139	35.058	2.57712	1.55262	0.00341466	0.0677789	2.73596	0.53256	1.42562	0.00575666	0.943568	0.177672	1.28076	1.29484	0.533701	0.21885
Ormdl1/2 double KO-3	0.129038	2.1281	217.002	115.225	103.272	3.82397	0.0558237	8.22919	1.164	13.3834	39.1054	1.48993	1.8684	0.00140552	0.0889311	1.98293	0.542291	1.81559	0.0165109	0.819672	0.263734	0.981613	1.37015	0.259312	0.511955
Ormdl1/2 double KO-4	0.284077	3.22273	221.861	125.156	101.895	3.21019	0.499148	8.76772	0.813667	12.4389	31.3512	1.37762	1.156	0.00793833	0.0454244	2.29388	0.439458	1.59429	0.0107552	0.669247	0.103773	1.11658	1.30955	0.312678	0.413207
Ormdl1/2 double KO-5	0.344793	2.46844	256.942	129.444	110.586	3.86819	0.158759	10.8198	0.873033	14.0852	33.3465	2.31233	1.7492	0.0103482	0.077002	2.69365	0.544171	1.28441	0.0361934	0.786421	0.177717	1.26585	1.27017	0.21373	0.324784
Ormdl1/2 double KO-6	0.290602	3.24291	269.699	131.377	111.838	4.19492	0.814959	15.0032	1.35028	22.0735	41.0514	2.36089	2.3101	0.00131695	0.0663369	2.56831	0.587367	2.02558	0.0478787	0.884644	0.315171	1.72773	1.96447	0.498955	0.357283
Ormdl1/2 double KO-7	0.0150736	3.3227	231.394	124.551	105.101	5.33076	0.1632	9.68973	0.67731	13.9105	28.6292	2.9136	1.75515	0.00165644	0.0531517	2.35825	0.359226	1.76767	0.0116748	0.788251	0.157016	1.346	1.27691	0.370062	0.423384
Ormdl1/2 double KO-8	0.0285771	3.14566	267.955	132.866	115.109	9.09939	0.498786	11.5129	1.77883	18.8457	43.9774	1.72745	2.49081	0.0164386	0.114528	3.01281	0.531235	1.91133	0.0177137	0.979458	0.22204	1.79997	2.2073	0.522192	0.399764
Ormdl1/3 double KO-1	0.31538	7.21104	793.6	146.223	530.901	4.69031	0.0298548	25.0752	1.48437	28.9283	49.9057	4.5629	4.25986	0.00983858	0.425069	38.6123	2.57808	34.6371	0.0614527	2.07238	0.190183	3.23033	2.47045	0.504509	0.48962
Ormdl1/3 double KO-2	0.34693	4.96223	852.107	196.725	535.868	5.72453	0.180109	16.6196	1.49228	16.0846	37.0587	1.32966	1.88234	0.0191965	0.459657	36.16	2.42455	27.7581	0.0960951	1.57122	0.124936	1.9039	1.78874	0.195655	0.245841
Ormdl1/3 double KO-3	0.577627	5.92998	1152.9	115.766	539.071	4.01721	0.606819	21.2096	1.74984	35.0818	73.3763	4.29664	3.27319	0.187702	0.65956	56.4988	3.01257	38.7318	0.174795	2.95407	0.350491	4.5593	4.01	0.438904	0.348836
Ormdl1/3 double KO-4	0.209483	8.39705	779.968	149.913	501.273	3.33377	0.142341	24.4183	1.89359	28.4296	46.6918	2.45651	3.29127	0.0340629	0.643545	36.4763	2.95757	33.4759	0.14916	2.16704	0.206077	2.98521	2.44456	0.335522	0.346759
Ormdl1/3 double KO-5	0.754909	6.53635	1100.54	99.838	571.382	5.87392	0.208969	31.5373	2.61108	46.6809	75.4237	4.11354	4.82494	0.013556	0.686351	53.1838	3.05049	42.388	0.238069	3.86544	0.43741	5.86082	5.27654	0.476875	0.628268
Ormdl1/3 double KO-6	0.058351	8.43769	1063.65	211.028	691.151	8.24407	1.07219	39.0247	3.36772	52.8028	86.2854	4.31624	6.41779	0.0176421	0.69685	55.4581	4.30947	46.1946	0.138709	3.49383	0.247423	4.86747	4.53243	0.748114	0.926552
Ormdl1/3 double KO-7	0.384013	5.29165	832.853	171.501	522.449	5.07919	0.691331	26.0684	2.22963	31.7417	58.3427	4.14705	2.92598	0.00752802	0.532769	40.806	2.97146	29.7263	0.163674	2.07811	0.160146	2.38831	2.90808	0.306018	0.29582
Ormdl1/3 double KO-8	0.242448	8.79005	729.851	155.526	428.578	2.96168	0.324485	27.5328	1.63214	33.7832	53.7416	4.20122	2.64189	0.00138703	0.429637	32.5353	2.27372	24.9236	0.172769	2.1838	0.161141	3.16291	3.03801	0.409602	0.489676
Ormdl2/3 double KO-1	0.0720994	2.78976	389.437	173.616	176.568	6.86964	0.467001	18.598	1.56953	25.1353	50.4922	0.954313	1.86913	0.0113381	1.02222	7.22769	0.697894	3.81504	0.00853178	5.58927	0.215359	11.0871	5.08798	0.564445	0.431029
Ormdl2/3 double KO-2	0.264337	2.75359	385.599	184.658	164.511	8.87421	0.343561	15.6992	1.45516	24.8088	42.5309	1.32166	2.05666	0.000386305	0.877058	5.61382	0.770268	5.40158	0.018835	5.30191	0.131222	10.1041	3.92387	0.55928	0.627253
Ormdl2/3 double KO-3	0.409987	3.88152	337.899	145.559	150.252	8.98383	0.0245792	19.4464	1.85041	31.1087	55.1459	3.74368	2.51144	0.00289589	1.23807	6.89955	0.641112	3.46701	0.0565063	5.13474	0.237607	10.9827	5.14187	0.490452	0.360952
Ormdl2/3 double KO-4	0.178831	4.65111	299.387	115.355	124.517	3.35041	0.458844	15.5111	1.17403	19.0085	37.1009	1.5664	2.08868	0.0105503	0.818425	4.34637	0.387637	4.35334	0.0361218	4.82261	0.200321	10.3737	4.53716	0.619877	0.292741
Ormdl2/3 double KO-5	0.2036	5.00321	332.078	139.912	137.573	3.87121	0.203084	18.8538	1.1877	19.1276	44.6745	1.12298	1.50455	0.0015663	0.949571	5.79231	0.473014	4.17008	0.0705794	4.87799	0.234343	9.92662	4.90389	0.682223	0.58577
Ormdl2/3 double KO-6	0.0352599	2.70204	287.186	115.317	124.692	4.63374	0.0388585	21.0445	1.51938	29.0129	60.7352	2.6858	2.2095	0.0224981	0.583772	5.28675	0.404433	3.31828	0.0329708	5.58782	0.183559	11.1895	4.43364	0.609094	0.494795
Ormdl2/3 double KO-7	0.0232176	4.08549	395.702	170.688	166.107	7.2022	0.169923	17.9354	1.37556	22.2996	42.5757	1.91774	1.51659	0.00237285	0.940349	6.62968	1.28668	4.95173	0.00473098	5.59666	0.13561	11.0819	4.82454	0.843245	0.220502
Ormdl2/3 double KO-8	0.0456746	4.78843	356.453	132.426	139.731	5.36965	0.512011	20.916	1.03678	30.6721	49.8119	4.41165	2.48729	0.0454519	0.878623	6.23196	0.433831	4.75854	0.0534767	6.10882	0.236555	13.4288	6.0432	0.488821	0.978988
