# Supplementary material for: The Ormdl genes regulate the sphingolipid synthesis pathway to ensure proper myelination and neurologic function in mice
Source: eLife. 2019 Dec 27;8:e51067. doi: 10.7554/eLife.51067 (PMC6934382; doi:10.7554/eLife.51067)
Supplement: Figure 1—source data 1. [file elife-51067-fig1-data1.xlsx]

## Sheet: brain ormdls
	Sphingolipid levels in brain from WT and Ormdl KO mice
		pmol/mg protein
	Dihydrosphingosine	Dihydroceramide	Ceramide	Sphingosine
WT-1	13.0839	17.0708	676.648	73.1221
WT-2	10.5306	11.0273	539.013	58.602
WT-3	13.3981	20.4474	751.104	72.5612
WT-4	9.26748	11.9162	440.566	55.4888
WT-5	13.3043	17.023	706.456	65.6003
WT-6	12.5605	18.4389	618.08	65.1207
WT-7	11.8476	13.7574	584.313	68.0872
WT-8	13.2639	14.3864	684.77	62.586
Ormdl1 KO-1	13.2575	17.5439	757.04	66.8509
Ormdl1 KO-2	17.983	16.9272	699.594	80.8281
Ormdl1 KO-3	10.0625	9.01453	518.78	49.3376
Ormdl1 KO-4	14.2927	17.2961	662.447	70.1122
Ormdl1 KO-5	13.7903	11.1995	550.196	68.5357
Ormdl1 KO-6	13.649	13.4668	576.397	64.8133
Ormdl1 KO-7	13.0099	12.8466	645.71	64.739
Ormdl1 KO-8	17.2783	17.9864	655.249	76.559
Ormdl2 KO-1	13.5278	19.5534	573.765	65.7774
Ormdl2 KO-2	11.5804	15.2932	603.522	63.0745
Ormdl2 KO-3	10.5669	12.2888	700.68	58.4268
Ormdl2 KO-4	15.8895	16.4799	656.208	70.3608
Ormdl2 KO-5	11.5906	9.58719	547.818	48.4257
Ormdl2 KO-6	11.8193	13.2303	607.487	57.537
Ormdl2 KO-7	11.5412	11.4857	592.6	55.0205
Ormdl2 KO-8	13.2407	13.515	665.163	62.7929
Ormdl3 KO-1	31.2658	22.0058	907.819	98.1789
Ormdl3 KO-2	30.4154	17.0344	914.442	107.128
Ormdl3 KO-3	30.3773	20.3616	933.519	96.2538
Ormdl3 KO-4	32.705	23.799	777.043	102.319
Ormdl3 KO-5	29.2124	21.7349	1002.86	111.568
Ormdl3 KO-6	26.2434	21.8659	815.087	89.7743
Ormdl3 KO-7	28.989	20.3306	1068.04	112.368
Ormdl3 KO-8	31.2722	22.9466	1226.71	130.105
Ormdl1/2 double KO-1	10.5015	9.5384	609.507	52.5425
Ormdl1/2 double KO-2	11.1893	9.22048	621.338	53.8975
Ormdl1/2 double KO-3	10.3043	8.6541	506.876	49.8555
Ormdl1/2 double KO-4	7.6388	8.31678	512.033	43.2818
Ormdl1/2 double KO-5	10.6607	8.68445	566.998	49.2692
Ormdl1/2 double KO-6	10.6906	11.045	605.607	55.0934
Ormdl1/2 double KO-7	9.06153	8.91326	527.454	46.0482
Ormdl1/2 double KO-8	12.0554	11.7348	609.035	58.8229
Ormdl1/3 double KO-1	69.9888	85.2813	1597.19	145.145
Ormdl1/3 double KO-2	52.8347	72.7478	1670.38	116.396
Ormdl1/3 double KO-3	80.9904	111.927	1957.86	179.745
Ormdl1/3 double KO-4	68.1847	82.2217	1550.42	139.916
Ormdl1/3 double KO-5	77.0071	116.106	1950.33	179.103
Ormdl1/3 double KO-6	80.3694	121.631	2175.85	179.063
Ormdl1/3 double KO-7	67.9375	82.3442	1663.7	157.173
Ormdl1/3 double KO-8	57.2103	69.7816	1449.81	135.909
Ormdl2/3 double KO-1	23.9422	35.7579	848.439	81.471
Ormdl2/3 double KO-2	19.5075	33.3296	834.875	70.1806
Ormdl2/3 double KO-3	22.5052	34.6535	760.817	83.7207
Ormdl2/3 double KO-4	20.4696	30.7988	624.348	74.6217
Ormdl2/3 double KO-5	20.0556	32.668	705.315	69.8196
Ormdl2/3 double KO-6	21.1703	32.1471	651.813	79.8064
Ormdl2/3 double KO-7	21.53	36.518	831.599	76.3474
Ormdl2/3 double KO-8	24.9421	39.6871	748.662	88.4096
