# Supplementary material for: The Ormdl genes regulate the sphingolipid synthesis pathway to ensure proper myelination and neurologic function in mice
Source: eLife. 2019 Dec 27;8:e51067. doi: 10.7554/eLife.51067 (PMC6934382; doi:10.7554/eLife.51067)
Supplement: Figure 3—figure supplement 1—source data 1. [file elife-51067-fig3-figsupp1-data1.xlsx]

## Sheet: sciatic nerve Ormdls
	Individual sphingolipid levels in sciatic nerve from WT and Ormdl KO mice
	Sciatic nerve sphingolipids - Individual ceramides with different fatty-acid chain lengths- pmol/mg protein													Sciatic nerve sphingolipids - Individual dihydroceramides with different fatty-acid chain lengths- pmol/mg protein
	C14-Cer	C16-Cer	C18-Cer	C18:1-Cer	C20-Cer	C20:1-Cer	C20:4-Cer	C22-Cer	C22:1-Cer	C24-Cer	C24:1-Cer	C26-Cer	C26:1-Cer	C14-DHCer	C16-DHCer	C18-DHCer	C18:1-DHCer	C20-DHCer	C20:1-DHCer	C22-DHCer	C22:1-DHCer	C24-DHCer	C24:1-DHCer	C26-DHCer	C26:1-DHCer
WT-1	1.0567	10.8085	38.5857	7.29214	22.1017	1.67651	0.00161197	29.9071	1.10147	135.475	61.2835	7.98437	2.1414	0.0235687	0.388682	1.76423	0.216722	1.60385	0.0231063	7.42923	0.391662	25.2599	8.95094	3.90641	0.209547
WT-2	0.598113	29.7662	34.7071	9.13958	22.5833	1.27999	0.0523765	48.9239	3.70513	162.687	88.735	8.33753	1.2951	0.387741	1.30578	1.29801	0.366704	2.13587	0.0360875	11.0945	1.2155	32.3582	13.034	1.95138	0.347474
WT-3	0.522762	21.0386	29.6097	8.16345	23.3712	3.77486	0.00305961	53.3843	1.97255	206.702	88.3623	15.2042	3.52111	0.0430806	1.21559	1.22706	0.142767	2.14972	0.129405	13.5193	1.24186	50.5919	13.4622	3.4724	1.4609
WT-4	1.33195	22.9192	35.1008	3.68815	15.4265	3.10076	0.011727	28.9134	0.584422	145.761	51.0662	24.9065	1.09418	0.256041	0.660891	2.3365	0.0737092	2.37264	0.0694806	7.88191	0.546424	39.4966	13.3018	3.79592	1.19062
WT-5	0.453845	12.8717	36.8818	8.09059	20.4354	8.71602	0.0336939	26.4871	2.94871	85.9904	42.721	14.826	0.128917	0.138604	0.606234	3.01754	0.177824	2.30224	0.033286	6.14255	0.685406	24.0279	8.18727	1.83302	1.45392
WT-6	0.074477	19.2387	35.4428	5.53684	24.989	0.632945	0.0900717	30.635	2.25275	121.872	47.193	8.77261	1.35611	0.23909	0.697329	1.6844	0.105096	1.36906	0.0684872	9.02492	1.30228	22.9591	9.8259	3.07036	1.03077
WT-7	0.832634	14.2263	33.3832	5.21838	21.4266	1.12339	0.075546	31.3554	3.90008	132.873	51.9632	6.75933	1.38396	0.00728656	0.824459	1.80088	0.192678	2.26336	0.189186	10.8136	1.35677	28.4235	9.77122	2.42968	1.08245
WT-8	0.947141	11.0736	42.9482	8.68334	20.1713	1.67258	0.00445053	22.9983	5.80078	89.4746	53.9934	10.0918	0.721175	0.0722418	0.356868	2.12051	0.702368	1.28718	0.0167007	5.18375	0.471897	16.1698	8.27858	0.807527	0.407224
Ormdl1 KO-1	0.299823	21.2602	24.64	3.89768	18.6148	0.345964	0.00526915	36.8663	1.51685	132.764	41.9041	12.1949	0.602571	0.00736364	0.698781	1.53546	0.0930728	2.06809	0.0753514	7.11403	0.290805	26.5712	8.38051	1.38067	0.69028
Ormdl1 KO-2	0.760705	24.6755	46.3457	2.81918	27.5191	1.70275	0.08866	58.3022	3.13915	156.234	54.146	4.15341	2.98471	0.670257	1.33776	1.94059	0.326053	1.83463	0.146739	8.50934	1.12012	22.4317	10.0011	3.3505	0.908448
Ormdl1 KO-3	1.53508	8.42416	28.957	4.77505	19.4876	3.37501	0.0173778	21.5837	1.25738	104.189	40.6403	7.59412	1.05147	0.012721	0.49396	1.2208	0.0444435	1.49768	0.0138429	7.0381	0.600028	20.9993	8.42813	1.79327	1.0296
Ormdl1 KO-4	0.332044	11.8106	29.1941	3.79782	16.2392	1.48926	0.0690061	29.2397	3.8297	110.412	48.704	11.5535	0.24079	0.107909	0.591994	1.66416	0.0500623	1.7724	0.221914	8.12616	0.705743	25.6954	6.76854	3.17049	1.41962
Ormdl1 KO-5	1.09331	14.0898	31.5693	9.80093	17.8698	2.44197	0.0334498	24.6225	0.874201	111.462	48.181	9.91648	3.27506	0.0120996	0.533901	1.55409	0.134917	1.58649	0.0654888	7.54784	0.647092	24.4052	7.59876	1.4624	1.38241
Ormdl1 KO-6	0.140937	11.5766	38.7833	5.21929	17.6095	1.13937	0.0881923	34.2987	2.55226	138.279	48.5561	8.09167	0.746681	0.0944127	0.741152	2.62744	0.108344	1.92453	0.0714737	9.83016	0.984494	32.1331	8.3342	3.68541	1.87946
Ormdl1 KO-7	1.48435	11.777	40.257	5.89391	24.2904	2.071	0.159148	35.9731	2.4585	133.12	60.3036	15.6121	4.24286	0.0217218	0.563018	2.15018	0.605503	2.08696	0.0126764	9.16613	1.09013	40.4161	11.0534	3.76091	2.47827
Ormdl1 KO-8	0.0661956	13.1688	47.7823	5.76941	30.837	4.05808	0.00376545	48.6389	1.13358	164.001	58.6068	19.3961	1.02379	0.0915736	0.939082	1.95659	0.195781	2.3946	0.187901	9.18673	0.480646	36.8327	15.3606	1.79618	1.54657
Ormdl3 KO-1	0.239819	47.2718	111.246	9.69458	64.1272	7.36789	0.00466894	222.088	6.28898	1009.99	158.5	47.7185	11.3129	0.450737	7.29166	28.1754	0.836367	38.9842	0.391553	64.548	2.15262	316.791	36.2921	29.5484	9.27727
Ormdl3 KO-2	0.827947	18.5282	123.572	14.1728	62.3254	4.83422	0.175587	202.674	8.66015	885.719	147.694	39.3812	6.754	1.45953	2.38015	11.2649	0.73468	10.4068	0.480545	49.8564	1.71213	291.71	31.2392	21.7262	6.52197
Ormdl3 KO-3	0.442504	37.0365	71.8099	5.75399	50.675	2.97333	0.0609938	145.967	7.19266	472.193	129.43	35.2939	7.83359	0.0421424	3.17394	4.78241	0.628699	6.56122	0.17998	29.7758	1.28355	150.251	24.5666	8.32762	2.86885
Ormdl3 KO-4	2.67708	25.8935	93.83	4.50747	60.1542	4.46721	0.073801	159.301	5.35933	752.239	169.547	46.8546	7.36105	0.0437339	2.50953	7.00467	0.648823	9.68299	0.157851	47.3105	1.65972	297.825	26.9983	19.2839	5.90953
Ormdl3 KO-5	0.730716	11.6101	106.566	9.21997	74.9785	4.34511	0.0330064	155.573	6.37035	671.277	153.1	72.0555	6.43701	0.0171447	1.05228	10.2264	0.418859	9.89338	0.373541	50.1332	1.50527	284.832	27.2222	30.2097	6.41963
Ormdl3 KO-6	0.0345862	31.3172	81.9398	14.8545	57.5023	4.85888	0.0303157	132.932	6.34013	573.259	160.428	38.7644	5.92252	0.371146	1.3721	6.03066	0.20572	6.7399	0.0175532	39.304	0.862664	230.539	30.7331	17.0584	4.46522
Ormdl3 KO-7	1.84267	26.8873	84.7077	4.75296	55.6169	7.6353	0.00752414	98.9366	4.26771	449.698	138.105	54.3524	7.7448	0.464163	1.44303	5.89189	1.7394	8.27011	0.0144049	35.3142	2.19849	184.335	18.9603	17.8252	3.63389
Ormdl1/3 double KO-1	0.694555	54.5261	143.717	14.5128	102.501	3.38919	0.0611315	251.679	12.4192	929.766	302.159	36.9182	24.5839	0.458653	7.23261	20.0783	0.620234	23.2255	0.358039	62.6217	2.68438	378.413	87.5105	18.2508	11.1556
Ormdl1/3 double KO-2	0.57936	60.2847	154.432	17.5022	113.182	3.47953	0.65344	343.711	16.8263	1261.19	351.321	37.6897	31.0173	1.51045	8.14321	27.0736	0.420334	27.9613	0.614127	88.5414	4.83959	504.762	107.289	27.2036	14.6006
Ormdl1/3 double KO-3	0.392725	82.0726	210.935	16.7201	173.104	7.83019	0.10597	324.793	19.8869	1155.3	334.249	47.0389	26.9803	0.253133	10.3381	35.2313	0.615292	48.0998	0.636354	82.4987	3.04387	444.492	96.2452	22.8833	13.3684
Ormdl1/3 double KO-4	3.19699	74.5606	238.348	20.945	153.706	13.5226	0.0345116	340.828	17.9508	1274.64	351.754	49.1725	29.759	0.22076	8.86512	35.2212	1.19867	37.2561	0.76851	79.0359	4.01824	572.785	108.547	31.8554	18.133
Ormdl1/3 double KO-5	3.59513	51.0644	170.805	13.0939	128.621	4.83937	0.0342445	453.027	25.5348	1514.38	414.905	45.9767	37.5854	1.20691	9.22028	29.6099	0.543899	35.7586	0.519238	90.2067	3.34752	559.487	127.707	29.7221	17.9003
Ormdl1/3 double KO-6	0.489257	73.1219	178.639	15.2276	131.382	2.54641	0.012847	352.588	20.9706	1357.52	353.957	57.5262	30.3597	0.278279	8.22235	26.3968	0.385482	29.2311	0.421988	81.3123	3.78197	531.874	108.467	32.2445	17.1275
Ormdl1/3 double KO-7	0.861324	53.1267	155.87	14.5975	99.6651	4.60273	0.0068672	334.968	22.4545	1250.58	353.539	47.374	33.4825	0.34282	7.13485	25.1786	0.597932	24.5364	0.493497	74.6393	3.40115	484.956	111.824	27.7857	16.0745
Ormdl1/3 double KO-8	0.455346	54.7888	150.574	12.609	112.268	3.45848	0.0541185	348.03	18.5103	1350.09	361.741	39.0559	40.3921	0.420171	7.49322	24.6342	0.60951	28.8143	0.424272	85.7539	3.59862	569.695	109.322	32.696	18.4084
	Sciatic nerve individual hexosylceramides with different fatty-acid chain lengths- pmol/mgg protein
	C14HexosylCer	C16HexosylCer	C18HexosylCer	C18:1HexosylCer	C20HexosylCer	C20:1HexosylCer	C22HexosylCer	C22:1HexosylCer	C24HexosylCer	C24:1HexosylCer	C26HexosylCer	C26:1HexosylCer
WT-1	13.2	1191.1	3774.7	140.4	1889.4	383.1	1178.7	150.9	3373.9	2939.7	99.5	172.9
WT-2	13.6	1176.6	3173.5	123.2	1433	285.5	985.9	113.7	3036.7	2503.7	85.3	143.8
WT-3	22.9	1367	3308.9	118.1	1425	286.3	1108	116	3163.3	2574.2	87.1	162.6
WT-4	23.4	1448.5	3596.4	135.3	1485.3	313.5	1132.2	124.5	3484.8	2726.6	95.9	178
WT-5	27.4	1354.6	3515.2	122	1413.9	305.8	1091.1	121.3	3124.6	2409.1	100.6	151.3
WT-6	20.9	1007.5	3039.8	110.2	1413.1	274.4	974.2	116.1	3097.6	2456.3	78.4	144.7
WT-7	49.1	1425.6	3769.6	134.8	1556.3	293.6	1374.1	128.2	4097.6	4124.8	69.1	202.7
WT-8	23.7	1466.8	3399.4	125.2	1473.9	316	1088.9	125.7	3188.6	2406.1	100.9	147
Ormdl1 KO-1	34.2	1986.7	4417.5	150.5	2009.8	348.5	1521.2	154.7	4239	3204.1	128.1	191.1
Ormld1 KO-2	36.8	1498.4	4749.5	156.2	3084.8	448.8	1694.9	210.8	5108.1	4033.6	147.7	210
Ormld1 KO-3	45.9	1652.6	4248.1	136.3	1959.4	345.3	1443.2	158.5	4214.5	3511.7	107.3	204.7
Ormld1 KO-4	30.8	1407.9	3561.6	108.3	1623.6	290.8	1188.5	130.8	3376.6	2730.6	95.2	168.7
Ormld1 KO-5	44.3	2042.2	4938.1	151.9	2211.4	392.9	1654.8	181.4	4767.7	3935.8	133.8	234.6
Ormld1 KO-6	44	1463	4357.6	128.4	2247.3	383.5	1470.9	173.3	4348.2	3692.9	119.1	198.1
Ormld1 KO-7	59.9	2023.9	5923.8	180.8	2909.2	511.6	1895.1	221.6	5665.2	4819.3	152.7	260.6
Ormld1 KO-8	77.4	2592.3	7420.4	246.2	3870	665.1	2460.2	293.1	7748.7	6121.1	189.8	336.2
Ormdl3 KO-1	10.4	1484.5	4393.4	130.1	3451.8	500.1	1848.5	294.7	5224.5	5245.1	122.2	214.3
Ormdl3 KO-2	13.6	2011.2	5898.3	176.5	4200.5	592.7	2392.2	341.4	6396.3	5727.1	200.5	298.4
Ormdl3 KO-3	17.1	997.3	3264	97.8	1724	266.9	1256.9	154.2	3422	2929.9	126.7	177.9
Ormdl3 KO-4	9.5	853.4	2668.9	80.2	1776.4	263	1097.3	152.4	2995.6	2714.9	100.1	147.9
Ormdl3 KO-5	27	1144.7	3843.6	100.8	2108.6	309.2	1414.3	179.1	4108.4	3471.4	149.8	221.1
Ormdl3 KO-6	32.2	1489.4	4274.3	114	2007.4	353.8	1587	167	4260.6	3586.1	142	240.9
Ormdl3 KO-7	24.7	1219.6	3905.7	107.5	1855.1	338.4	1317.2	166.5	3743.6	3170.8	121.4	208.4
Ormdl1/3 double KO-1	3.1	1728.3	1470.8	56	588.1	112.2	626.5	81	1809.5	2234.4	27.3	77.8
Ormdl1/3 double KO-2	7.5	1402.6	1359.5	58.1	543.1	111.2	622.6	77.7	1895.3	2461.1	39.3	88.4
Ormdl1/3 double KO-3	3.4	1097.5	1327.5	50.9	427.1	80	526.3	63.6	1689.8	2039.6	30.3	80.9
Ormdl1/3 double KO-4	2.3	1174.7	1058.7	43.5	427	79.2	469.2	61.5	1366.5	1676.7	26.7	65.6
Ormdl1/3 double KO-5	1.6	1068.5	864.4	33.8	368.1	63.6	381.9	53.8	1238.3	1479.6	20.8	50.5
Ormdl1/3 double KO-6	1.9	687.9	845.3	31.8	307.7	61.4	356.8	40.1	1095.9	1153.4	21.6	55.2
Ormdl1/3 double KO-7	2.5	787	888.7	34.6	320.7	67.1	399.1	44.4	1195	1371.5	23.1	58.2
Ormdl1/3 double KO-8	3.2	758.2	910.8	37.8	331	65	398.5	48	1225.8	1477	22.5	57.2
