# Supplementary material for: The Ormdl genes regulate the sphingolipid synthesis pathway to ensure proper myelination and neurologic function in mice
Source: eLife. 2019 Dec 27;8:e51067. doi: 10.7554/eLife.51067 (PMC6934382; doi:10.7554/eLife.51067)
Supplement: Figure 3—source data 1. [file elife-51067-fig3-data1.xlsx]

## Sheet: sciatic nerve Ormdls
	Sphingolipid levels in sciatic nerve from WT and Ormdl KO mice
			pmol/mg protein
	Dihydrosphingosine	Dihydroceramide	Ceramide	Sphingosine	Hexosylceramide
WT-1	15.1015	50.1679	319.416	46.16	15307.5
WT-2	19.8273	65.5313	411.811	52.9906	13074.5
WT-3	29.0296	88.6563	455.63	73.867	13739.4
WT-4	10.4399	71.9825	333.905	20.4527	14744.4
WT-5	20.3512	48.6058	260.585	39.5738	13736.9
WT-6	13.4971	51.3768	298.087	26.725	12733.2
WT-7	16.2381	59.1551	304.521	32.7372	17225.5
WT-8	8.93623	35.8746	268.581	32.9445	13862.2
Ormdl1 KO-1	11.5191	48.9056	294.913	21.0762	18385.4
Ormld1 KO-2	12.7282	52.5773	382.871	24.4163	21379.6
Ormld1 KO-3	12.7607	43.1719	242.887	28.5319	18027.5
Ormld1 KO-4	11.5348	50.2944	266.911	28.4506	14713.4
Ormld1 KO-5	15.7827	46.9307	275.23	35.4806	20688.9
Ormld1 KO-6	15.16	62.4141	307.082	27.4949	18626.3
Ormld1 KO-7	13.483	73.405	337.643	32.8576	24623.7
Ormld1 KO-8	14.7847	70.9689	394.486	29.5466	32020.5
Ormdl3 KO-1	28.2204	534.74	1695.85	47.854	22919.6
Ormdl3 KO-2	22.9924	429.492	1515.32	47.4955	28248.7
Ormdl3 KO-3	20.523	232.441	966.662	43.018	14434.7
Ormdl3 KO-4	29.8508	419.035	1332.27	58.7407	12859.6
Ormdl3 KO-5	32.5612	422.304	1272.3	77.3136	17078
Ormdl3 KO-6	24.8316	337.7	1108.18	47.4347	18254.7
Ormdl3 KO-7	23.6529	280.09	934.555	51.7886	16178.9
Ormdl1/3 double KO-1	158.668	612.609	1876.93	517.058	8815
Ormdl1/3 double KO-2	118.789	812.959	2391.87	367.097	8666.4
Ormdl1/3 double KO-3	140.84	757.706	2399.41	443.847	7416.9
Ormdl1/3 double KO-4	197.527	897.904	2568.41	557.224	6451.6
Ormdl1/3 double KO-5	131.225	905.229	2863.46	399.994	5624.9
Ormdl1/3 double KO-6	157.008	839.743	2574.34	478.997	4659
Ormdl1/3 double KO-7	176.317	776.965	2371.13	511.537	5191.9
Ormdl1/3 double KO-8	181.082	881.87	2492.03	522.359	5335
