# Supplementary material for: The Ormdl genes regulate the sphingolipid synthesis pathway to ensure proper myelination and neurologic function in mice
Source: eLife. 2019 Dec 27;8:e51067. doi: 10.7554/eLife.51067 (PMC6934382; doi:10.7554/eLife.51067)
Supplement: Figure 4—figure supplement 1—source data 1. — DHC16, C16-dihydroceramide. [file elife-51067-fig4-figsupp1-data1.xlsx]

## Sheet: liver fSPT-Mx1Cre
	Individual sphingolipid levels in liver from Stop-fSPT and fSPT-Mx1Cre mice
							pmol/mg protein
	C14-Cer	C16-Cer	C18-Cer	C18:1-Cer	C20-Cer	C20:1-Cer	C20:4-Cer	C22-Cer	C22:1-Cer	C24-Cer	C24:1-Cer	C26-Cer	C26:1-Cer	DHC16-Cer	Dihydrosphingosine	Sphingosine
Stop-fSPT-13	1.45	10.55	8.8	1.1	5.6	1.7	0.05	10.8	3.6	20.15	27	0.4	0.25	0.7	0.7	0.65
Stop-fSPT-14	1.45	12.1	5.9	0.75	3.9	0.55	0	10.15	3.65	21.15	29.85	0.75	0.3	0.7	0.7	0.75
Stop-fSPT-15	1.15	11.1	6.5	0.85	3.6	0.75	0.05	9.65	3.05	19.15	24.15	0.6	0.3	0.65	0.75	0.7
Stop-fSPT-16	1.35	10.65	2.9	0.65	9.3	1.75	0.15	29.4	13.35	32.1	34.5	0.2	0.2	0.9	0.5	0.4
Stop-fSPT-17	0.6	9.1	3.05	0.25	5.55	2.4	0	13.8	8.65	16.5	30.6	0.4	0.15	0.55	0.7	0.7
fSPT-Mx1Cre-1	2.05	24.75	16	1.55	16.05	2.05	0.05	27.85	8.1	52.6	91.2	1.25	0.7	3.1	0.7	0.65
fSPT-Mx1Cre-2	3.95	23	19.6	1.8	14.2	1.8	0.05	23.25	6.45	42.6	73.9	0.95	0.65	2.6	0.9	0.55
fSPT-Mx1Cre-3	2.85	16.35	11.65	1.15	12.8	1.55	0.1	27	7.45	45.35	76.85	1.2	0.65	2	1.95	0.85
fSPT-Mx1Cre-4	2.55	19.6	16.1	0.8	10.7	0.75	0.05	32.75	6.8	45.85	111.95	1.1	0.55	3.55	1.15	1
fSPT-Mx1Cre-5	3.15	22.05	22.25	1.75	13.05	1.6	0	29.6	6.75	41.35	90.35	0.7	0.6	9.35	0.85	0.75
fSPT-Mx1Cre-6	2.75	19.15	13.8	0.9	13.5	1.55	0	43.05	7.75	40.65	161.95	0.9	0.85	2.6	0.35	7.65
fSPT-Mx1Cre-7	2.15	14	11.9	0.8	10.45	1.95	0.05	27.45	8.4	30.45	129.95	1.1	0.4	1.95	0.15	5
fSPT-Mx1Cre-8	4.6	14.25	13.2	1.1	12	1.35	0.1	25.5	8.7	37.1	132	0.95	0.45	1.7	0.2	6.05
