# Supplementary material for: The Ormdl genes regulate the sphingolipid synthesis pathway to ensure proper myelination and neurologic function in mice
Source: eLife. 2019 Dec 27;8:e51067. doi: 10.7554/eLife.51067 (PMC6934382; doi:10.7554/eLife.51067)
Supplement: Figure 4—figure supplement 2—source data 1. [file elife-51067-fig4-figsupp2-data1.xlsx]

## Sheet: Sciatic nerve fSPT-plpCre
	Individual sphingolipid levels in sciatic nerve from Stop-fSPT and fSPT-plpCre mice
	Individual ceramides with different fatty-acid chain lengths- pmol/mg protein													Sciatic nerve sphingolipids - Individual dihydroceramides with different fatty-acid chain lengths- pmol/mg protein
	C14-Cer	C16-Cer	C18-Cer	C18:1-Cer	C20-Cer	C20:1-Cer	C20:4-Cer	C22-Cer	C22:1-Cer	C24-Cer	C24:1-Cer	C26-Cer	C26:1-Cer	C14-DHCer	C16-DHCer	C18-DHCer	C18:1-DHCer	C20-DHCer	C20:1-DHCer	C22-DHCer	C22:1-DHCer	C24-DHCer	C24:1-DHCer	C26-DHCer	C26:1-DHCer
Stop-fSPT-1	8.29257	27.2986	55.3933	8.33267	82.005	1.38949	0.375009	232.073	10.3145	749.623	174.916	29.7668	28.3316	2.1801	2.89964	6.62967	0.843798	21.8877	0.723635	20.1223	5.37318	53.8774	52.8343	8.02086	2.40049
Stop-fSPT-2	7.90643	38.6657	81.288	7.49701	94.6638	2.68116	0.0237083	313.256	12.7301	821.632	335.774	32.5641	28.3086	3.13268	3.90131	14.8957	0.720685	30.595	0.527328	54.342	5.94991	137.123	71.8594	14.6392	4.34439
Stop-fSPT-3	6.2897	39.4288	66.6907	7.04844	88.8388	1.3751	0.0687681	394.565	15.1963	1188.63	276.392	43.4997	47.5438	1.92981	3.37181	7.96715	0.475252	22.4032	0.995196	46.1146	7.13396	99.8506	73.2182	11.6642	4.9807
Stop-fSPT-4	7.55014	52.5414	86.9773	8.78161	101.55	2.47514	0.237707	441.098	18.9223	1168.57	431.392	33.453	46.0335	2.46222	4.6267	10.1248	1.20344	21.9229	1.36843	44.2757	4.49887	104	117.76	10.2437	6.44506
Stop-fSPT-5	3.13639	15.4411	49.8667	12.0736	19.4608	8.09528	0.469729	13.5092	17.3323	13.3455	181.884	0.563263	1.6073	1.06746	1.26807	4.57653	3.80701	13.7794	6.67969	4.56738	11.2075	2.71893	11.9551	0.351709	0.427541
Stop-fSPT-6	2.42758	16.8949	43.4602	8.00092	20.5667	2.8976	0.191404	18.2953	10.3741	15.292	179.665	0.506697	3.11699	0.648581	1.20065	2.50486	3.15158	8.11799	5.14653	3.22508	9.26743	4.53873	11.175	0.499539	0.803933
Stop-fSPT-7	4.44956	15.7761	45.3362	5.63472	24.6408	2.91334	0.0917386	21.1064	8.53576	18.9719	164.5	0.501808	2.45752	0.35122	1.27368	4.28323	2.39194	11.4489	4.32725	4.49952	9.36906	5.06897	10.5408	0.893218	0.753268
fSPT-plpCre-1	50.7833	474.929	901.616	48.5641	1086.96	31.2627	0.516404	2414.4	177.07	3535.96	2643.3	123.452	317.579	55.7735	182.998	315.078	7.87324	488.613	10.7164	244.893	32.7627	778.208	520.015	28.1288	40.3353
fSPT-plpCre-2	25.5974	192.297	626.099	37.5516	978.097	22.8505	0.280266	5616.71	203.826	10008.7	3095.78	502.861	637.667	25.5022	76.6786	280.292	6.92115	747.366	11.8056	1073.04	53.8493	3130.81	1185.45	267.516	185.368
fSPT-plpCre-3	40.2477	401.69	878.496	51.4416	1135.2	33.9562	0.48353	3791.5	223.6	6027.17	3221.98	305.998	460.54	34.1023	153.624	401.406	6.03873	752.338	9.0987	670.362	30.4267	1882.27	753.807	133.213	104.424
fSPT-plpCre-4	21.1864	209.371	497.32	39.5614	788.459	22.3198	0.236552	2656.33	137.94	4475.27	1888.34	193.823	329.178	23.6183	85.522	197.187	4.32005	506.307	7.46695	375.661	29.3311	1303.19	639.855	81.6924	73.5091
fSPT-plpCre-5	23.7362	278.55	688.099	40.8124	1026.81	25.5725	0.434653	3659.7	188.754	6251.28	2705.87	270.311	447.146	28.8363	129.313	315.153	4.24319	672.363	7.55558	620.569	34.5925	1855.25	707.008	117.264	94.2179
fSPT-plpCre-6	9.9495	255.295	643.822	33.4566	858.144	24.3599	0.205308	2318.4	145.367	3593.01	1817.59	220.351	295.076	8.84777	95.9913	249.99	3.0776	461.573	6.45679	357.964	22.9142	1101.97	390.386	82.976	58.4829
fSPT-plpCre-7	10.0379	250.985	606.98	31.435	847.12	22.2073	0.139089	2442.47	164.543	4087.18	1978.08	203.431	322.464	8.57306	94.7549	256.291	4.12098	523.847	5.36249	406.132	27.3265	1281.62	400.847	78.5164	60.1192
fSPT-plpCre-8	10.848	296.11	735.608	34.7353	824.969	26.634	0.200851	2454.04	180.491	3681.87	2299.88	218.615	324.169	9.21915	116.28	313.813	3.37708	490.558	5.32687	396.403	24.2538	1235.08	395.544	76.8724	56.3005
	Individual hexosylceramides with different fatty-acid chain lengths- pmol/mg protein
	C14-HexosylCer	C16-HexosylCer	C18-HexosylCer	C18:1-HexosylCer	C20-HexosylCer	C20:1-HexosylCer	C22-HexosylCer	C22:1-HexosylCer	C24-HexosylCer	C24:1-HexosylCer	C26-HexosylCer	C26:1-HexosylCer
Stop-fSPT-8	105.926	3324.06	6763.2	55.8712	5002.21	82.8839	3452.68	226.525	9063.79	14401.3	421.286	370.818
Stop-fSPT-9	114.127	2688.11	7490.58	59.3895	4209.63	138.97	2766.71	223.964	7360.92	12548.2	320.951	320.951
Stop-fSPT-10	150.811	3083.28	6568.07	64.9165	4055.73	119.058	2561.85	244.025	7129.78	12150.9	352.909	298.382
Stop-fSPT-11	128.309	3278	7006.85	52.5851	4513.67	120.892	2998.28	258	8362.53	13087.2	401.203	342.327
Stop-fSPT-12	127.168	2423.92	5740.61	51.2941	3714.01	102.88	2480.39	183.488	7367.49	10779	353.145	286.925
fSPT-plpCre-9	120.03	3152.33	3769.19	62.9828	2037.34	105.714	1897.29	243.809	3856.05	8440.59	137.737	152.426
fSPT-plpCre-10	104.106	2838.55	3678.2	42.756	2202.29	100.812	1999.9	251.063	4335.67	8961.38	162.985	168.046
fSPT-plpCre-11	76.2202	2352.83	3097.43	35.3132	1768.16	74.4224	1542.13	194.664	3531.65	7035.13	140.006	132.934
fSPT-plpCre-12	129.154	3728.83	4542.33	47.311	2716.8	119.93	2343.9	288.635	5178.87	9995.76	207.706	225.66
fSPT-plpCre-13	94.8944	3635.99	3407.85	32.4166	2098.47	91.1532	1900.26	229.714	3907.55	8327.08	144.382	167.735
fSPT-plpCre-14	98.5878	2347.16	3377.52	40.1456	2029.49	91.1688	1793.28	229.218	3634.14	7635.54	147.124	154.822
fSPT-plpCre-15	40.0222	1961.3	2739.43	21.3828	1868.44	70.7211	1708.74	206.227	3409.34	7179.75	109.742	146.063
