# Supplementary material for: The Ormdl genes regulate the sphingolipid synthesis pathway to ensure proper myelination and neurologic function in mice
Source: eLife. 2019 Dec 27;8:e51067. doi: 10.7554/eLife.51067 (PMC6934382; doi:10.7554/eLife.51067)
Supplement: Figure 4—source data 1. [file elife-51067-fig4-data1.xlsx]

## Sheet: Sciatic nerve fSPT-plpCre
	Sphingolipid levels in sciatic nerve from Stop-fSPT and fSPT-plpCre mice
		pmol/mg protein					pmol/mg protein
	Dihydrosphingosine	Dihydroceramide	Ceramide	Sphingosine			Hexosylceramide
Stop-fSPT-1	7.92917	177.793	1408.11	16.2804		Stop-fSPT-8	43270.5
Stop-fSPT-2	11.8109	342.031	1776.99	20.4085		Stop-fSPT-9	38242.5
Stop-fSPT-3	11.1525	280.105	2175.56	22.9143		Stop-fSPT-10	36779.7
Stop-fSPT-4	13.5974	328.932	2399.58	34.7058		Stop-fSPT-11	40549.8
Stop-fSPT-5	10.2047	62.4062	336.785	29.3703		Stop-fSPT-12	33610.3
Stop-fSPT-6	13.1135	50.2799	321.689	34.0302
Stop-fSPT-7	14.1161	55.2011	314.915	35.3186
fSPT-plpCre-1	950.611	2705.39	11806.4	2084.89		fSPT-plpCre-9	23975.5
fSPT-plpCre-2	481.482	7044.6	21948.3	1059.21		fSPT-plpCre-10	24845.8
fSPT-plpCre-3	791.531	4931.11	16572.3	1768.01		fSPT-plpCre-11	19980.9
fSPT-plpCre-4	587.557	3327.66	11259.3	1452.02		fSPT-plpCre-12	29524.9
fSPT-plpCre-5	627.719	4586.36	15607.1	1501.78		fSPT-plpCre-13	24037.5
fSPT-plpCre-6	417.367	2840.63	10215	662.156		fSPT-plpCre-14	21578.2
fSPT-plpCre-7	441.535	3147.51	10967.1	731.299		fSPT-plpCre-15	19461.2
fSPT-plpCre-8	454.195	3123.03	11088.2	800.339
